# Supplementary material for: The Effects of Cognitive Load on Strategy Utilization in a Forced-Choice Recognition Memory Performance Validity Test
Source: Atypon-hosted journal article supplement (doi:10.1027/1015-5759/a000636), 2021-03-02
Supplement: 1015-5759_a000636_esm1.pdf [file 1015-5759_a000636_esm1.pdf]

**Electronic Supplementary Material 1.** Summary of strategies used by simulators.

| Category                                            | Description                                                           | Illustrative quotes                                                                                                                                                                                                                             |
|-----------------------------------------------------|-----------------------------------------------------------------------|-------------------------------------------------------------------------------------------------------------------------------------------------------------------------------------------------------------------------------------------------|
| Intuitive (i.e., manipulation of accuracy measures) | Randomly / haphazardly                                                | "I pressed randomly on the keyboard"                                                                                                                                                                                                            |
|                                                     | Avoiding making too many errors                                       | "Sometimes I chose the correct answer and then a few incorrect ones so that they didn't seem too obvious"                                                                                                                                       |
|                                                     | Other                                                                 | "I tried to make errors even when I knew the correct response"<br>"I deliberately responded incorrectly"                                                                                                                                        |
| Non-intuitive                                       | Manipulation of response times (i.e., responding slowly)              | "I tried to respond slowly"<br>"I took more time before responding"                                                                                                                                                                             |
|                                                     | Manipulation of response times (i.e., impulsivity)                    | "I was impulsive"<br>"Sometimes I pressed the button before the word appeared on the screen"                                                                                                                                                    |
|                                                     | Inattentiveness or confusion                                          | "I did not concentrate on what was needed to succeed in the task"<br>"I tried to appear confused"                                                                                                                                               |
|                                                     | Modifying performance according to perceived level of difficulty      | "I tried to correctly recall items at the beginning of the task, when it was easier, and then to show more frequent forgetfulness"<br>"In the second part, I tried to repeat the errors I made in the first part, while adding additional ones" |
|                                                     | Feigning based on assumptions regarding individuals with brain injury | "I acted like someone with a brain injury that I am acquainted with"<br>"I tried to think like a real person with a brain injury"                                                                                                               |
